# Supplementary material
Source: PubMed Central journal article supplement (PMC7483721)
Supplement: NIHMS1584251-supplement-02.pdf [file NIHMS1584251-supplement-02.pdf]

Table 2. Summary of the Bias Domains and Prompting Items of the Quality In Prognosis Studies (QUIPS) Tool<sup>2</sup>

| Bias Domains                                                                                                                                               | Prompting Items to be considered                                                                                                                                                                                                                                                                                                                                                                                                                                                                                                                                                                                                    |
|------------------------------------------------------------------------------------------------------------------------------------------------------------|-------------------------------------------------------------------------------------------------------------------------------------------------------------------------------------------------------------------------------------------------------------------------------------------------------------------------------------------------------------------------------------------------------------------------------------------------------------------------------------------------------------------------------------------------------------------------------------------------------------------------------------|
| <p><b>Study participation</b><br/>Optimal study: The study sample adequately represents the population of interest</p>                                     | <ul style="list-style-type: none"> <li>a. Adequate participation in the study by eligible persons</li> <li>b. Description of the source population or population of interest</li> <li>c. Description of the baseline study sample</li> <li>d. Adequate description of the sampling frame and recruitment</li> <li>e. Adequate description of the period and place of recruitment</li> <li>f. Adequate description of inclusion and exclusion criteria</li> </ul>                                                                                                                                                                    |
| <p><b>Study attrition</b><br/>Optimal study: The study data available (i.e., participants not lost to follow up) adequately represent the study sample</p> | <ul style="list-style-type: none"> <li>a. Adequate response rate for study participants</li> <li>b. Description of attempts to collect information on patients who dropped out</li> <li>c. Reasons for loss to follow-up are provided</li> <li>d. Adequate description of participants lost to follow-up</li> <li>e. There are no important differences between participants who completed the study and those who did not</li> </ul>                                                                                                                                                                                               |
| <p><b>Prognostic factor measurement</b><br/>Optimal study: The prognostic factor is measured in a similar way for all participants</p>                     | <ul style="list-style-type: none"> <li>a. A clear definition or description of the prognostic factor is provided</li> <li>b. Method of prognostic factor measurement is adequately valid and reliable</li> <li>c. Continuous variables are reported, or appropriate cut points are used</li> <li>d. The method and setting of measurement of prognostic factor is the same for all study participants</li> <li>e. Adequate proportion of the study sample has complete data for the prognostic factor</li> <li>f. Appropriate methods of imputation are used for missing prognostic factor data</li> </ul>                          |
| <p><b>Outcome measurement</b><br/>Optimal study: The outcome of interest is measured in a similar way for all participants</p>                             | <ul style="list-style-type: none"> <li>a. A clear definition of the outcome is provided</li> <li>b. Method of outcome measurement used is adequately valid and reliable</li> <li>c. The method and setting of outcome measurement is the same for all study participants</li> </ul>                                                                                                                                                                                                                                                                                                                                                 |
| <p><b>Study confounding</b><br/>Optimal study: Important potential confounding factors are appropriately accounted for</p>                                 | <ul style="list-style-type: none"> <li>a. All important confounders are measured</li> <li>b. Clear definitions of the important confounders measured are provided</li> <li>c. Measurement of all important confounders is adequately valid and reliable</li> <li>d. The method and setting of confounding measurement are the same for all study participants</li> <li>e. Appropriate methods are used if imputation is used for missing confounder data</li> <li>f. Important potential confounders are accounted for in the study design</li> <li>g. Important potential confounders are accounted for in the analysis</li> </ul> |
| <p><b>Statistical analysis and reporting</b><br/>Optimal study: The statistical analysis is appropriate, and all primary outcomes are reported</p>         | <ul style="list-style-type: none"> <li>a. Sufficient presentation of data to assess the adequacy of the analytic strategy</li> <li>b. Strategy for model building is appropriate and is based on a conceptual framework or model</li> <li>c. The selected statistical model is adequate for the design of the study</li> <li>d. There is no selective reporting of results</li> </ul>                                                                                                                                                                                                                                               |
