# Supplementary material
Source: PubMed Central journal article supplement (PMC7483721)
Supplement: NIHMS1584251-supplement-03.pdf [file NIHMS1584251-supplement-03.pdf]

Table 3. List of Included Studies

| Study                                                               | Study Type                  | Imaging Method | Mean of Age at Baseline (yrs) | Definition of Minimum GA Lesion size | Total No. of Eyes (Patients) | No. of Eyes in Groups                                    | Average Length of Follow-up (mos) | Mean ± SE of Baseline GA Area (mm <sup>2</sup> )                         | Mean ± SE of GA Effective Radius Growth Rate (mm/yr) | Horizontal Shift (yrs)            |
|---------------------------------------------------------------------|-----------------------------|----------------|-------------------------------|--------------------------------------|------------------------------|----------------------------------------------------------|-----------------------------------|--------------------------------------------------------------------------|------------------------------------------------------|-----------------------------------|
| Allingham et al, 2016 <sup>1</sup>                                  | Retrospective observational | FAF            | 79.1                          | 1.0 mm <sup>2</sup>                  | 49 (30)                      | Unifocal: 30<br>Multifocal: 19                           | 15.6                              | Unifocal: 8.13±1.04*<br>Multifocal: 6.65±1.07*                           | Unifocal: 0.156±0.026<br>Multifocal: 0.171±0.040     | Unifocal: 12.0<br>Multifocal: 7.2 |
| Domalpally et al, 2013 <sup>2</sup><br>AREDS<br>NCT00000145         | Prospective interventional  | CFP            | 69.7                          | 1.33 mm <sup>2</sup>                 | 583 (503)                    | Unifocal: 458<br>Multifocal: 125                         | 48                                | Unifocal: 2.80±0.18<br>Multifocal: 4.38±0.29                             | Unifocal: 0.147±0.007<br>Multifocal: 0.237±0.015     | Unifocal: 7.2<br>Multifocal: 6.3  |
| Hariri et al, 2015 <sup>3</sup><br>MAHALO<br>NCT01229215            | Prospective interventional  | OCT            | 79.7                          | 125 µm in diameter                   | 108 (108)                    | Unifocal: 47<br>Multifocal: 61                           | 18                                | Unifocal: 7.84±0.71<br>Multifocal: 5.78±0.46                             | Unifocal: 0.142±0.015<br>Multifocal: 0.222±0.028     | Unifocal: 11.7<br>Multifocal: 6.9 |
| Holz et al, 2018 <sup>4</sup><br>Chroma<br>NCT02247479              | Prospective interventional  | FAF            | 78.0                          | 1.27 mm <sup>2</sup>                 | 274 (274)                    | Unifocal: 53<br>Multifocal: 221                          | 11                                | Unifocal: 8.56±0.54*<br>Multifocal: 7.83±0.26*                           | Unifocal: 0.173±0.013<br>Multifocal: 0.218±0.008     | Unifocal: 12.3<br>Multifocal: 8.0 |
| Holz et al, 2018 <sup>4</sup><br>Spectri<br>NCT02247531             | Prospective interventional  | FAF            | 78.0                          | 1.27 mm <sup>2</sup>                 | 291 (291)                    | Unifocal: 68<br>Multifocal: 223                          | 11                                | Unifocal: 7.78±0.42*<br>Multifocal: 7.49±0.28*                           | Unifocal: 0.177±0.011<br>Multifocal: 0.211±0.007     | Unifocal: 11.7<br>Multifocal: 7.8 |
| Keenan et al, 2018 <sup>5</sup><br>AREDS2<br>NCT00345176            | Prospective interventional  | CFP            | 74.9                          | 0.146 mm <sup>2</sup>                | 1181 (869)                   | Unifocal: 881<br>Multifocal: 300                         | 54                                | Unifocal: 4.24±0.11 <sup>†‡</sup><br>Multifocal: 4.52±0.19 <sup>†‡</sup> | Unifocal: 0.144±0.005<br>Multifocal: 0.203±0.006     | Unifocal: 8.6<br>Multifocal: 6.1  |
| Klein et al, 2008 <sup>6</sup><br>BDES                              | Prospective observational   | CFP            | 80.8                          | 175 µm in diameter                   | 53 (32)                      | Unifocal: 46<br>Multifocal: 7                            | 60                                | Unifocal: 5.94±0.76<br>Multifocal: 2.02±0.46                             | Unifocal: 0.107±0.016<br>Multifocal: 0.262±0.028     | Unifocal: 9.7<br>Multifocal: 4.8  |
| Marsiglia et al, 2013 <sup>7</sup>                                  | Retrospective observational | FAF            | 81.9                          | 300 µm in diameter                   | 126 (92)                     | Unifocal: 21<br>Multifocal: 105                          | 20                                | Unifocal: 4.00±0.63 <sup>‡</sup><br>Multifocal: 4.40±0.28 <sup>‡</sup>   | Unifocal: 0.041±0.018<br>Multifocal: 0.112±0.007     | Unifocal: 7.7<br>Multifocal: 5.6  |
| Monés et al, 2018 <sup>8</sup><br>GAIN<br>NCT01694095               | Prospective observational   | FAF            | 78.1                          | 250 µm in diameter                   | 128 (128)                    | Unifocal: 42<br>Multifocal: 86                           | 37                                | Unifocal: 9.30±1.16<br>Multifocal: 6.34±0.63                             | Unifocal: 0.142±0.013<br>Multifocal: 0.208±0.014     | Unifocal: 12.8<br>Multifocal: 7.2 |
| Rosenfeld et al, 2018 <sup>9</sup><br>SEATTLE<br>NCT01802866        | Prospective interventional  | FAF            | 77.1                          | 1.25 mm <sup>2</sup>                 | 104 (104)                    | Unifocal: 32 <sup>§</sup><br>Multifocal: 72 <sup>§</sup> | 24                                | Unifocal: 7.38±0.69 <sup>†‡</sup><br>Multifocal: 7.95±0.46 <sup>†‡</sup> | Unifocal: 0.147±0.016<br>Multifocal: 0.186±0.016     | Unifocal: 11.4<br>Multifocal: 7.9 |
| Schmitz-Valckenberg et al, 2016 <sup>10</sup><br>GAP<br>NCT00599846 | Prospective observational   | FAF            | 76.9                          | 1.25 mm <sup>2</sup>                 | 506 (506)                    | Unifocal: 123<br>Multifocal: 383                         | 12                                | Unifocal: 5.87±0.42*<br>Multifocal: 7.47±0.26*                           | Unifocal: 0.117±0.022<br>Multifocal: 0.191±0.010     | Unifocal: 10.0<br>Multifocal: 7.7 |
| Yehoshua et al., 2011 <sup>11</sup>                                 | Prospective observational   | OCT            | 83.0                          | 0.12 mm <sup>2</sup>                 | 86 (64)                      | Unifocal: 23<br>Multifocal: 63                           | 13                                | Unifocal: 6.75±1.09<br>Multifocal: 3.80±0.43                             | Unifocal: 0.107±0.014<br>Multifocal: 0.181±0.012     | Unifocal: 10.7<br>Multifocal: 5.5 |

AREDS = Age-Related Eye Disease Study; BDES = Beaver Dam Eye Study; CFP = color fundus photography; FAF = fundus autofluorescence; FAM = Fundus Autofluorescence in Age-related Macular Degeneration; GAIN = Geographic Atrophy Progression in Patients With Age-Related Macular Degeneration; GAP = Geographic Atrophy Progression; OCT = optical coherence tomography; SE = standard error; SEATTLE, safety and efficacy assessment treatment trials of emixustat hydrochloride.

\*Data was obtained directly from the authors in the original study.

<sup>†</sup>The mean baseline GA area was calculated mathematically from the reported annual growth rate of GA area and square root of GA area.

<sup>‡</sup>Standard deviation of the baseline GA size in the group was not reported and was estimated as the standard deviation of the entire population in the corresponding study.

<sup>§</sup>For Rosenfeld et al., we estimated the number of eyes in the unifocal and multifocal GA group as [the percentage of eyes receiving placebo and with follow-ups of GA size] × [total number of eyes in the corresponding focality group].

## References:

1. Allingham MJ, Nie Q, Lad EM, et al. Semiautomatic segmentation of rim area focal hyperautofluorescence predicts progression of geographic atrophy due to dry age-related macular degeneration. *Invest Ophthalmol Vis Sci* 2016;57(4):2283-9.
2. Domalpally A, Danis RP, White J, et al. Circularity index as a risk factor for progression of geographic atrophy. *Ophthalmology* 2013;120(12):2666-71.
3. Hariri A, Nittala MG, Sadda SR. Outer retinal tubulation as a predictor of the enlargement amount of geographic atrophy in age-related macular degeneration. *Ophthalmology* 2015;122(2):407-13.
4. Holz FG, Sadda SR, Busbee B, et al. Efficacy and safety of lapaizumab for geographic atrophy due to age-related macular degeneration: Chroma and Spectri phase 3 randomized clinical trials. *JAMA ophthalmology* 2018;136(6):666-77.
5. Keenan TD, Agron E, Domalpally A, et al. Progression of geographic atrophy in age-related macular degeneration: AREDS2 report number 16. *Ophthalmology* 2018;125(12):1913-28.
6. Klein R, Meuer SM, Knudtson MD, Klein BE. The epidemiology of progression of pure geographic atrophy: the Beaver Dam Eye Study. *Am J Ophthalmol* 2008;146(5):692-9.
7. Marsiglia M, Boddu S, Bearely S, et al. Association between geographic atrophy progression and reticular pseudodrusen in eyes with dry age-related macular degeneration. *Invest Ophthalmol Vis Sci* 2013;54(12):7362-9.
8. Mones J, Biarnes M. The rate of progression of geographic atrophy decreases with increasing baseline lesion size even after the square root transformation. *Transl Vis Sci Technol* 2018;7(6):40.
9. Rosenfeld PJ, Dugel PU, Holz FG, et al. Emixustat hydrochloride for geographic atrophy secondary to age-related macular degeneration: a randomized clinical trial. *Ophthalmology* 2018;125(10):1556-67.
10. Schmitz-Valckenberg S, Sahel JA, Danis R, et al. Natural history of geographic atrophy progression secondary to age-related macular degeneration (Geographic Atrophy Progression Study). *Ophthalmology* 2016;123(2):361-8.
11. Yehoshua Z, Rosenfeld PJ, Gregori G, et al. Progression of geographic atrophy in age-related macular degeneration imaged with spectral domain optical coherence tomography. *Ophthalmology* 2011;118(4):679-86.
