# Supplementary material
Source: PubMed Central journal article supplement (PMC7483721)
Supplement: NIHMS1584251-supplement-06.pdf [file NIHMS1584251-supplement-06.pdf]

Table 6A. Univariate Meta-Regression of the Mean Difference in the Effective Radius Growth Rate Between Unifocal and Multifocal GA

| Variables        | Heterogeneity Accounted by the Variable | P value from the Test of the Variable | Subgroups                   | Estimate | SE    | 95%CI           | P value |
|------------------|-----------------------------------------|---------------------------------------|-----------------------------|----------|-------|-----------------|---------|
| Imaging Modality | 0%                                      | 0.15                                  |                             | Ref.     | Ref.  | Ref.            | Ref.    |
|                  |                                         |                                       | CFP                         | Ref.     | Ref.  | Ref.            | Ref.    |
|                  |                                         |                                       | FAF                         | -0.029   | 0.016 | [-0.060, 0.002] | 0.07    |
|                  |                                         |                                       | OCT                         | -0.004   | 0.023 | [-0.05, 0.042]  | 0.85    |
| Study Type       | 0%                                      | 0.25                                  |                             | Ref.     | Ref.  | Ref.            | Ref.    |
|                  |                                         |                                       | Prospective interventional  | Ref.     | Ref.  | Ref.            | Ref.    |
|                  |                                         |                                       | Prospective observational   | 0.026    | 0.016 | [-0.005, 0.057] | 0.10    |
|                  |                                         |                                       | Retrospective observational | 0.005    | 0.023 | [-0.041, 0.050] | 0.84    |

Table 6B. Univariate Meta-Regression of the Effective Radius Growth Rate of Unifocal GA

| Variables        | Heterogeneity Accounted by the Variable | P value from the Test of the Variable | Subgroups                   | Estimate | SE    | 95%CI            | P value |
|------------------|-----------------------------------------|---------------------------------------|-----------------------------|----------|-------|------------------|---------|
| Imaging Modality | 0%                                      | 0.92                                  |                             | Ref.     | Ref.  | Ref.             | Ref.    |
|                  |                                         |                                       | CFP                         | Ref.     | Ref.  | Ref.             | Ref.    |
|                  |                                         |                                       | FAF                         | 0.002    | 0.026 | [-0.050, 0.053]  | 0.95    |
|                  |                                         |                                       | OCT                         | -0.011   | 0.035 | [-0.079, 0.057]  | 0.75    |
| Study Type       | 62.2%                                   | 0.003                                 |                             | Ref.     | Ref.  | Ref.             | Ref.    |
|                  |                                         |                                       | Prospective interventional  | Ref.     | Ref.  | Ref.             | Ref.    |
|                  |                                         |                                       | Prospective observational   | -0.034   | 0.016 | [-0.065, -0.004] | 0.03    |
|                  |                                         |                                       | Retrospective observational | -0.068   | 0.022 | [-0.112, -0.024] | 0.003   |

Table 6C. Univariate Meta-Regression of the Effective Radius Growth Rate of Multifocal GA

| Variables        | Heterogeneity Accounted by the Variable | P value from the Test of the Variable | Subgroups                   | Estimate | SE    | 95%CI            | P value |
|------------------|-----------------------------------------|---------------------------------------|-----------------------------|----------|-------|------------------|---------|
| Imaging Modality | 3.3%                                    | 0.25                                  |                             | Ref.     | Ref.  | Ref.             | Ref.    |
|                  |                                         |                                       | CFP                         | Ref.     | Ref.  | Ref.             | Ref.    |
|                  |                                         |                                       | FAF                         | -0.043   | 0.026 | [-0.094, 0.008]  | 0.10    |
|                  |                                         |                                       | OCT                         | -0.032   | 0.035 | [-0.101, 0.037]  | 0.37    |
| Study Type       | 90.9%                                   | < 0.001                               |                             | Ref.     | Ref.  | Ref.             | Ref.    |
|                  |                                         |                                       | Prospective interventional  | Ref.     | Ref.  | Ref.             | Ref.    |
|                  |                                         |                                       | Prospective observational   | -0.013   | 0.011 | [-0.034, 0.008]  | 0.22    |
|                  |                                         |                                       | Retrospective observational | -0.094   | 0.014 | [-0.121, -0.067] | < 0.001 |

CFP = color fundus photography; CI = confidence interval; FAF = fundus autofluorescence; GA = geographic atrophy; OCT = optical coherence tomography; Ref. = reference; SE = standard error.
